# Supplementary material
Source: PubMed Central journal article supplement (PMC7964326)
Supplement: 4171_tables.pdf [file 4171_tables.pdf]

**On-line Table 1: Site, scanner, and image information for the TCIA subjects analyzed in the initial cohort**

| Subject      | Site                      | Scanner                           | Year | T1wCE              |                   | FLAIR              |                   |
|--------------|---------------------------|-----------------------------------|------|--------------------|-------------------|--------------------|-------------------|
|              |                           |                                   |      | Resolution         | Section Thickness | Resolution         | Section Thickness |
|              |                           |                                   |      | (mm <sup>2</sup> ) | (mm)              | (mm <sup>2</sup> ) | (mm)              |
| TCGA-02-0033 | MD Anderson Cancer Center | Genesis Signa 1.5T <sup>a</sup>   | 1997 | 0.78 × 0.78        | 6.5               | 0.78 × 0.78        | 6.5               |
| TCGA-02-0048 | MD Anderson Cancer Center | Genesis Signa 1.5T                | 1999 | 0.98 × 0.98        | 1.5               | 0.78 × 0.78        | 6.5               |
| TCGA-02-0064 | MD Anderson Cancer Center | Signa Excite 3T <sup>a</sup>      | 1999 | 0.47 × 0.47        | 6.5               | 0.94 × 0.94        | 2                 |
| TCGA-02-0068 | MD Anderson Cancer Center | Signa Excite 1.5T                 | 2000 | 0.86 × 0.86        | 6.5               | 0.86 × 0.86        | 6.5               |
| TCGA-02-0075 | MD Anderson Cancer Center | Signa Excite 3T                   | 1999 | 0.86 × 0.86        | 1.5               | 0.86 × 0.86        | 6.5               |
| TCGA-06-0137 | Henry Ford Hospital       | NA                                | 2001 | 0.94 × 0.94        | 3                 | 0.94 × 0.94        | 3                 |
| TCGA-06-0139 | Henry Ford Hospital       | NA                                | 2004 | 0.47 × 0.47        | 2.5               | 0.47 × 0.47        | 2.5               |
| TCGA-06-0143 | Henry Ford Hospital       | NA                                | 2005 | 0.47 × 0.47        | 3                 | 0.47 × 0.47        | 2.5               |
| TCGA-06-0154 | Henry Ford Hospital       | NA                                | 1996 | 0.94 × 0.94        | 3                 | 0.94 × 0.94        | 3                 |
| TCGA-06-0164 | Henry Ford Hospital       | NA                                | 1999 | 0.94 × 0.94        | 3                 | 0.94 × 0.94        | 3                 |
| TCGA-08-0358 | UCSF Med. Ctr.            | Genesis Signa 1.5T                | 2002 | 1.02 × 1.02        | 1.5               | 0.86 × 0.86        | 0.86              |
| TCGA-14-1794 | Emory Univ.               | Intera 1.5T <sup>b</sup>          | 1998 | 0.45 × 0.45        | 6                 | 0.45 × 0.45        | 6                 |
| TCGA-15-2714 | Mayo Clinic               | Signa Excite 1.5T                 | 1996 | 0.86 × 0.86        | 4                 | 0.86 × 0.86        | 4                 |
| TCGA-76-5384 | Thomas Jefferson Univ.    | Magnetom Vision 1.5T <sup>c</sup> | 2000 | 0.86 × 0.86        | 7.5               | 0.86 × 0.86        | 7.5               |
| TCGA-76-6190 | Thomas Jefferson Univ.    | Magnetom Vision 1.5T              | 1998 | 0.47 × 0.47        | 1.5               | 0.86 × 0.86        | 7.5               |

**Note:**—UCSF Med. Ctr. indicates University of California, San Francisco Medical Center; Univ., University; NA, not applicable.

<sup>a</sup> GE Healthcare, Milwaukee, Wisconsin.

<sup>b</sup> Philips Healthcare, Best, the Netherlands.

<sup>c</sup> Siemens, Erlangen, Germany.

**On-line Table 2: Site, scanner, and image information for the TCIA subjects analyzed in the validation cohort**

| Subject      | Site                      | Scanner                   | Year | T1wCE              |                   | FLAIR              |                   |
|--------------|---------------------------|---------------------------|------|--------------------|-------------------|--------------------|-------------------|
|              |                           |                           |      | Resolution         | Section Thickness | Resolution         | Section Thickness |
|              |                           |                           |      | (mm <sup>2</sup> ) | (mm)              | (mm <sup>2</sup> ) | (mm)              |
| HFI058       | Henry Ford Hospital (REM) | NA                        | 1992 | 0.94 × 0.94        | 3.0               | 0.78 × 0.78        | 3.0               |
| HFI139       | Henry Ford Hospital (REM) | NA                        | 1993 | 0.94 × 0.94        | 3.0               | 0.94 × 0.94        | 3.0               |
| TCGA-06-0166 | Henry Ford Hospital       | Genesis Signa 1.5T        | 2004 | 0.94 × 0.94        | 3.0               | 0.94 × 0.94        | 3.0               |
| TCGA-06-0187 | Henry Ford Hospital       | NA                        | 2004 | 0.94 × 0.94        | 2.5               | 0.94 × 0.94        | 2.5               |
| TCGA-06-0190 | Henry Ford Hospital       | NA                        | 2004 | 0.94 × 0.94        | 2.5               | 0.94 × 0.94        | 2.5               |
| TCGA-06-0646 | Henry Ford Hospital       | NA                        | 2005 | 0.47 × 0.47        | 2.5               | 0.47 × 0.47        | 2.5               |
| TCGA-06-5413 | Henry Ford Hospital       | NA                        | 2008 | 0.47 × 0.47        | 2.5               | 0.47 × 0.47        | 2.5               |
| TCGA-19-2631 | Case Western              | Avanto 1.5T <sup>a</sup>  | 2003 | 1.00 × 1.00        | 1.0               | 0.90 × 0.90        | 5.5               |
| TCGA-76-5385 | Thomas Jefferson Univ.    | Magnetom Vision 1.5T      | 2000 | 0.51 × 0.51        | 1.5               | 0.86 × 0.86        | 7.5               |
| TCGA-76-5386 | Thomas Jefferson Univ.    | Achieva 1.5T <sup>b</sup> | 2000 | 0.86 × 0.86        | 7.0               | 0.86 × 0.86        | 6.0               |
| TCGA-76-5387 | Thomas Jefferson Univ.    | Achieva 3T                | 2001 | 0.45 × 0.45        | 5.0               | 0.69 × 0.69        | 6.0               |
| TCGA-76-6192 | Thomas Jefferson Univ.    | Magnetom Vision 1.5T      | 2001 | 0.50 × 0.50        | 1.5               | 0.86 × 0.86        | 7.5               |
| TCGA-76-6280 | Thomas Jefferson Univ.    | Achieva 1.5T              | 1998 | 0.94 × 0.94        | 1.5               | 0.86 × 0.86        | 6.0               |
| TCGA-76-6288 | Thomas Jefferson Univ.    | Achieva 3T                | 2001 | 0.75 × 0.75        | 1.0               | 0.67 × 0.67        | 1.0               |
| TCGA-76-6663 | Thomas Jefferson Univ.    | Achieva 3T                | 2001 | 0.75 × 0.75        | 1.0               | 0.69 × 0.69        | 6.0               |

**Note:**—HF indicates Henry Ford Hospital patients within the Repository for Molecular Brain Neoplasia Data (REMBRANDT) <https://caintegrator.nci.nih.gov/rembrandt/>; REM, REMBRANDT cohort subject; NA, not applicable.

<sup>a</sup> Siemens, Erlangen, Germany.

<sup>b</sup> Philips Healthcare, Best, the Netherlands.
